# Supplementary material for: Exploring the trends of adaptation and evolution of sclerites with regards to habitat depth in sea pens
Source: PeerJ. 2022 Sep 21;10:e13929. doi: 10.7717/peerj.13929 (PMC9508890; doi:10.7717/peerj.13929)
Supplement: Supplemental Information 1 [file peerj-10-13929-s001.xlsx]

## Sheet: Sheet1
Supplemental table S1. List of sequences utilized in this study.
Species	Collection locality	Depth (m)	COI	mtMutS	ND2	Reference
Renillidae
Renilla sp. (YK166)	Carmabi, Curacao	5	ON586701	MK133484	MK133679	This study; Kushida and Reimer (2019)
Renilla reniformis (YK167)	Carmabi, Curacao	5	ON586723	MK133485	MK133680	Kushida and Reimer (2019)
Renilla muelleri	-	5	JX023273	JX023273	JX023273	Kayal et al. (2013)
Veretillidae
Cavernularina sp. (YK300)	Hokurei, Kumamoto, Japan	tidal flat	NA	ON603962	NA	This study
Veretillum sp. (YK96)	Kashiwa-jima, Kochi, Japan	32	ON586699	MK133435	MK133630	This study; Kushida and Reimer (2019)
Veretillum sp. (YK248)	Seragaki, Okinawa, Japan	17	ON586726	MK133545	MK133740	Kushida and Reimer (2019)
Cavernulina sp. (YK100)	Shirahama, Amami Oshima, Japan	19	ON586700	MK133439	MK133634	This study; Kushida and Reimer (2019)
Cavernulina sp. (YK102)	Kyoda, Okinawa, Japan	20	ON586721	MK133441	MK133636	Kushida and Reimer (2019)
Echinoptilidae
Echinoptilum sp. (YK281)	Minna-jima, Okinawa, Japan	208	ON586708	ON603957	ON603943	This study
Echinoptilum sp. (YKOCA325)	Motobu, Okinawa, Japan	118	NA	NA	ON603954	This study
Echinoptilum sp. (YK22)	Maeda, Okinawa, Japan	65	ON586695	MK133373	MK133568	This study; Kushida and Reimer (2019)
Kophobelemnidae
Sclerobelemnon sp. (YK282)	Minna-jima, Okinawa, Japan	207	NA	ON603958	NA	This study
Sclerobelemnon sp. (YK283)	Minna-jima, Okinawa, Japan	210	ON586727	ON603959	ON603944	This study
Sclerobelemnon theseus	Colombia	57~62	NA	DQ311679	DQ311678	McFadden et al. (2006)
Kophobelemnon sp. (YK263)	Kumamo Nada, Mie, Japan	729~793	ON586706	ON603955	ON603941	This study
Kophobelemnon sp. (YK298)	Shimoda, Shizuoka, Japan	400~450	ON586710	ON603961	ON603946	This study
Kophobelemnon sp. (YK318)	Tanabe Bay, Wakayama, Japan	694~752	ON586713	ON603965	ON603949	This study
Kophobelemnon sp. (YK319)	Tanabe Bay, Wakayama, Japan	694~752	ON586714	ON603966	ON603950	This study
Kophobelemnon macrospinosum	Tasman Sea, Australia	4380	NA	DQ302865	DQ302937	McFadden et al. (2006)
Kophobelemnon pauciflorum	Crozet, S Atlantic	4189	NA	KF313836	KF313809	Dolan et al. (2013)
Kophobelemnon sp. 1	Whittard Canyon	1113	MK919660	MK919660	MK919660	Hogan et al. (2019)
Kophobelemnon sp. 3	Whittard Canyon	1606	MK919661	MK919661	MK919661	Hogan et al. (2020)
Kophobelemnon sp. 4	Whittard Canyon	760	MK919662	MK919662	MK919662	Hogan et al. (2021)
Stachyptilidae
Stachyptilum dofleini (YK53)	Sagami Bay, Kanagawa, Japan	95~187	ON586696	MK133398	MK133593	This study; Kushida and Reimer (2019)
Gilibelemnon octodentatum	Seymour Island, Antarctica	110~378	MK603855	MK603841	NA	García-Cárdenas et al. (2019)
Protoptilidae
Distichoptilum sp. (YK321)	Tanabe Bay, Wakayama, Japan	694~752	ON586716	ON603968	ON603952	This study
Distichoptilum gracile	New Zealand, W Pacific	1211	NA	KF313843	KF313816	Dolan et al. (2013)
Distichoptilum gracile	Whittard Canyon	2350	MK919657	MK919657	MK919657	Hogan et al. (2019)
Protoptilum carpenteri (YK316)	Tanabe Bay, Wakayama, Japan	609~612	ON586711	ON603963	ON603947
Protoptilum sp.	Monterey, E Pacific	3208	NA	KF313844	KF313818	Dolan et al. (2013)
Protoptilum carpenteri	Whittard Canyon	965	MK919667	MK919667	MK919667	Hogan et al. (2019)
Funiculinidae
Funiculina armata	NE Atlantic	350	NA	KF313833	KF313807	Dolan et al. (2013)
Funiculina quadrangularis	Little Loch Broom, Scotland	15~40	MK919658	MK919658	MK919658	Hogan et al. (2019)
Umbellulidae
Umbellula carpenteri	Crozet, S Atlantic	4189	NA	KF313848	KF313821	Dolan et al. (2013)
Umbellula encrinus	Arctic Ocean	1400	NA	KF313849	KF313822	Dolan et al. (2013)
Umbellula magniflora	Marguerite Bay, Antarctica	840	NA	KF313851	KF313824	Dolan et al. (2013)
Umbellula thomsoni	Crozet, S Atlantic	4189	NA	KF313853	KF313826	Dolan et al. (2013)
Umbellula sp.1	Whittard Canyon, NE Atlantic	4040	NA	KF313855	KF313828	Dolan et al. (2013)
Umbellula huxleyi	Whittard Canyon	1772	MK919668	MK919668	MK919668	Hogan et al. (2019)
Pseudumbellulidae
Pseudumbellula sp. (YK320)	Tanabe Bay, Wakayama, Japan	694~752	ON586715	ON603967	ON603951	This study
Pseudumbellula sp.2	Crozet, S Atlantic	4189	NA	KF313856	KF313829	Dolan et al. (2013)
Solumbellula monocephalus	Indian Ocean	4229	NA	KF313852	KF313825	Dolan et al. (2013)
Scleroptilidae
Calibelemnon hinoenma (YK340)	Shirahama, Amami Oshima, Japan	32	ON586728	MW168258	MW168261	Kushida and Reimer (2020)
Calibelemnon hinoenma (YK341)	Shirahama, Amami Oshima, Japan	30	NA	MW168259	MW168260	Kushida and Reimer (2020)
Scleroptilum grandiflorum	Mid-Atlantic Ridge	2190	NA	KF313847	KF313820	Dolan et al. (2013)
Anthoptilidae
Anthoptilum grandiflorum	Greenland	1150	MK919655	MK919655	MK919655	Hogan et al. (2019)
Anthoptilum sp. 1	Whittard Canyon	3148	MK919656	MK919656	MK919656	Hogan et al. (2019)
Pennatulidae
Pteroeides caledonicum (YK215)	Ushibuka, Kumamoto, Japan	10	ON586703	MK133523	MK133718	This study; Kushida and Reimer (2019)
Pteroeides caledonicum (YK216)	Ushibuka, Kumamoto, Japan	10	ON586724	MK133524	MK133719	Kushida and Reimer (2019)
Pteroeides sp. (YK245)	Seragaki, Okinawa, Japan	20	ON586725	MK133542	MK133737	Kushida and Reimer (2019)
Pennatula cf. fimbriata (YK292)	Kumamo Nada, Mie, Japan	190	ON586709	ON603960	ON603945	This study
Pennatula sp. (YK88)	Otuchi, Iwate, Japan	77~102	ON586698	MK133427	MK133622	This study; Kushida and Reimer (2019)
Pennatula sp. (YK89)	Otuchi, Iwate, Japan	77~102	ON586720	MK133428	MK133623	Kushida and Reimer (2019)
Pennatula murrayi	Monterey, E Pacific	3208	NA	KF313842	KF313815	Dolan et al. (2013)
Pennatula phosphorea	Millport, NE Atlantic	55	NA	KF313841	KF313814	Dolan et al. (2013)
Pennatula aculeata	Whittard Canyon	1726	MK919663	MK919663	MK919663	Hogan et al. (2019)
Ptilella grandis	Whittard Canyon	1338	MK919665	MK919665	MK919665	Hogan et al. (2019)
Ptilella grayi	Rockall Bank, NE Atlantic	474	MK882497	MK603847	NA	García-Cárdenas et al. (2019)
Gyrophyllum sp.	Tasman Sea, Australia	-	NA	DQ302869	DQ302942	McFadden et al. (2006)
Gyrophyllum sp.	New Zealand, W Pacific	997	NA	KF313846	KF313819	Dolan et al. (2013)
Halipteridae
Halipteris finmarchica	New Zealand, W Pacific	555	NA	KF313935	KF313808	Dolan et al. (2013)
Virgulariidae
Virgularia sp. (YK86)	Oura, Okinawa, Japan	1~5	ON586697	MK133425	MK133620	This study; Kushida and Reimer (2019)
Virgularia cf. gustaviana (YK210)	Ushibuka, Kumamoto, Japan	9	ON586702	MK133518	MK133713	This study; Kushida and Reimer (2019)
Virgularia gustaviana (YK220)	Shirato, Kumamoto, Japan	6	ON586704	MK133528	MK133723	This study; Kushida and Reimer (2019)
Scytalium sp. (YK271)	Sumuide, Okinawa, Japan	22	ON586707	ON603956	ON603942	This study
Scytalium martensii (YK250)	Gabu, Okinawa, Japan	13	ON586705	MK133547	MK133742	This study; Kushida and Reimer (2019)
Stylatula elongata	-	14~18	JX023275	JX023275	JX023275	Kayal et al. (2013)
Virgulariidae sp. (YK317)	Tanabe Bay, Wakayama, Japan	609~612	ON586712	ON603964	ON603948	This study
Virgulariidae sp. (YK323)	Off Ofunato, Iwate, Japan	400	ON586717	ON603969	ON603953	This study
Unknown
Pennatulacea sp. (WAM23)	Candlemas Island, Sub-Antarctic	185	ON586718	ON603970	NA	This study
Pennatulacea sp. (WAM78)	Candlemas Island, Sub-Antarctic	185	ON586719	ON603971	NA	This study
Ellisellidae (Outgroup)
Viminella sp. (YK104)	Takosaki, Iriomote, Japan	27	NA	MK133443	MK133638	Kushida and Reimer (2019)
Ellisella sp. (YK122)	West Pass inside channel north side, Palau	26	ON586722	MK133457	MK133652	This study; Kushida and Reimer (2019)
Junceella sp. (YK136)	Cemetary Reef, Palau	20	ON586729	MK133469	MK133664	This study; Kushida and Reimer (2019)
