# Supplementary material for: Exploring the trends of adaptation and evolution of sclerites with regards to habitat depth in sea pens
Source: PeerJ. 2022 Sep 21;10:e13929. doi: 10.7717/peerj.13929 (PMC9508890; doi:10.7717/peerj.13929)
Supplement: Supplemental Information 2 [file peerj-10-13929-s002.xlsx]

## Sheet: Sheet1
Supplemental table S2. List of sclerites from observed specimens utilized in this study.
Registration No.	Serial No.	Species	Clade	Depth (m)	Sclerites in rachis	Sclerites in tentacles	Sclerites in Polyp leaves	Notes
		Renillidae
NSMT-Co1760	YK167	Renilla reniformis (YK167)	2	5	Three-flanged rods	None	No Polyp leaves	Rachis: Three-flanged trait is weak
		Veretillidae
NSMT-Co1761	YK300	Cavernularina sp. (YK300)	1	Tidal flat	Smooth rods with pointed ends	None	No Polyp leaves
NSMT-Co1762	YK248	Veretillum sp. (YK248)	1	17	Irragularly shaped plates, smooth edge plates	None	No Polyp leaves
NSMT-Co1763	YK102	Cavernulina sp. (YK102)	1	20	Plates, bone shaped plates	None	No Polyp leaves
		Echinoptilidae
NSMT-Co1764	YKOCA325	Echinoptilum sp. (YKOCA325)	2	118	Three-flanged needle, three-flanged rods	None	No Polyp leaves
		Kophobelemnidae
NSMT-Co1765	YK282	Sclerobelemnon sp. (YK282)	1	207	Smooth edge plates	None	No Polyp leaves
NSMT-Co1766	YK298	Kophobelemnon sp. (YK298)	3	400~450	Three-flanged rods with warts	three-flanged rods	No Polyp leaves
NSMT-Co1767	YK318	Kophobelemnon sp. (YK318)	3	694~752	Three-flanged rods	Three-flanged rods	No Polyp leaves
NSMT-Co1768	YK319	Kophobelemnon sp. (YK319)	3	694~752	Three-flanged needles	Three-flanged rods	No Polyp leaves
		Stachyptilidae
NSMT-Co1769	YK53	Stachyptilum dofleini (YK53)	2	95~187	Three-flanged needle, three-flanged rods	three-flanged rods	No Polyp leaves
		Protoptilidae
NSMT-Co1770	YK321	Distichoptilum sp. (YK321)	2	694~752	Three-flanged rods	None	No Polyp leaves
NSMT-Co1771	YK316	Protoptilum carpenteri (YK316)	2	609~612	Threeflanged needles	Three-flanged rods	No Polyp leaves
		Pseudumbellulidae
NSMT-Co1772	YK320	Pseudumbellula sp. (YK320)	4	694~752	Three-flanged rods, three-flanged spindle with serrated edges	Rods with spines, spindle, three-flanged rods	No Polyp leaves
		Scleroptilidae
NSMT-Co1709	YK340	Calibelemnon hinoenma (YK340)	1	32	None	None	No Polyp leaves
NSMT-Co1711	YK341	Calibelemnon hinoenma (YK341)	1	30	None	None	No Polyp leaves
		Pennatulidae
NSMT-Co1773	YK216	Pteroeides caledonicum (YK216)	1	10	Rods	Too small to observe	Rods, needles
NSMT-Co1774	YK89	Pennatula sp. (YK89)	2	77~102	Three-flanged needles, three-flanged rods	Three-flanged rods	Three-flanged needles, three-flanged rods	Three-flanged trait is weak
		Virgulariidae
NSMT-Co1775	YK86	Virgularia sp. (YK86)	1	1~5	None	None	None
NSMT-Co1776	YK210	Virgularia cf. gustaviana (YK210)	1	9	None	None	None
NSMT-Co1777	YK220	Virgularia gustaviana (YK220)	1	6	None	None	None
NSMT-Co1778	YK271	Scytalium sp. (YK271)	2	22	Smooth edge plates	Smooth edge plates	Smooth edge plates	Tentacles: Sclerites are few
NSMT-Co1779	YK317	Virgulariidae sp. (YK317)	1	609~612	None	None	None
NSMT-Co1780	YK323	Virgulariidae sp. (YK323)	1	400	Thin rods (plates-like)	Thin rods (plates-like)	None	Rachis: Sclerites are few
		Unknown
WAMZ44543	WAM23	Pennatulacea sp. (WAM23)	3	185	Spindles with warts	Three flanged rods	No Polyp leaves	Crystals produced during observing process
