# Supplementary material for: Exploring the trends of adaptation and evolution of sclerites with regards to habitat depth in sea pens
Source: PeerJ. 2022 Sep 21;10:e13929. doi: 10.7717/peerj.13929 (PMC9508890; doi:10.7717/peerj.13929)
Supplement: Supplemental Information 3 — Shallower group: shallower than 400 m; consisting of the shallow + mesophotic + shallower deep categories. Deeper group: deeper than 400 m; consisting of the medium deep + deep categories [file peerj-10-13929-s003.xlsx]

## Sheet: Sheet1
Supplemental table S3. Contingency table of clades (four large clades) and depth groups. Shallower group: shallower than 400 m; consisting of the shallow + mesophotic + shallower deep categories. Deeper group: deeper than 400 m; consisting of the medium deep + deep categories.
	Clade
Depth group	1	2	3	4
Deeper group	9	9	9	5
Shallower group	15	13	3	0
