# Supplementary material for: Exploring the trends of adaptation and evolution of sclerites with regards to habitat depth in sea pens
Source: PeerJ. 2022 Sep 21;10:e13929. doi: 10.7717/peerj.13929 (PMC9508890; doi:10.7717/peerj.13929)
Supplement: Supplemental Information 4 [file peerj-10-13929-s004.xlsx]

## Sheet: Sheet1
Table S4. Contingency table of clades (four large clades) and sclerite shapes.
	Clade
Sclerite shapes	1	2	3	4
None	13	0	0	0
Plates	6	2	0	0
Spindles	0	0	1	1
Smooth rod or needles	4	0	0	0
Three-flanged sclerites	1	20	11	4
