# Supplementary material for: Exploring the trends of adaptation and evolution of sclerites with regards to habitat depth in sea pens
Source: PeerJ. 2022 Sep 21;10:e13929. doi: 10.7717/peerj.13929 (PMC9508890; doi:10.7717/peerj.13929)
Supplement: Supplemental Information 5 — Shallower group: shallower than 400 m; consisting of the shallow + mesophotic + shallower deep categories. Deeper group: deeper than 400 m; consisting of the medium deep + deep categories. [file peerj-10-13929-s005.xlsx]

## Sheet: Sheet1
Supplemental table S5. Contingency table of the depth groups and sclerite shapes. Shallower group: shallower than 400 m; consisting of the shallow + mesophotic + shallower deep categories. Deeper group: deeper than 400 m; consisting of the medium deep + deep categories.
	Sclerites
Depth groups	None	Plates	Spindles	Smooth rod or needles	Three flanged sclerites
Deeper group	8	0	1	0	23
Shallower group	5	8	1	4	13
